# Supplementary material for: Local Conformational Changes in the DNA Interfaces of Proteins
Source: PLoS One. 2013 Feb 13;8(2):e56080. doi: 10.1371/journal.pone.0056080 (PMC3571985; doi:10.1371/journal.pone.0056080)
Supplement: Table S2 — PDB IDs and chains in DBfree, DBbound and DBfree>2. (XLSX) [file pone.0056080.s002.xlsx]

## Sheet: DBfree, DBbound
	PDB IDs and chains in DBfree and DBbound
	Cluster ID	PDB ID(chainID) in DBfree	PDB ID(chainID) in DBcomplex
	1	1aqi(A), 1aqi(B), 1aqj(A), 1aqj(B), 2adm(A), 2adm(B)	2ih2(A), 2ih2(D), 2ibt(A), 2ibt(D), 2ih5(A), 2jg3(A), 2jg3(D), 2np7(A), 1g38(A), 1g38(D), 2ih4(A), 2ih4(D), 2np6(A), 2np6(D), 2ibs(A), 2ibs(D)
	2	1aro(P)	1cez(A), 2pi4(A), 2pi5(A)
	3	1az3(A), 1az3(B), 1az4(A), 1az4(B), 1rve(A), 1rve(B)	1sx5(A), 1sx5(B), 1eon(A), 1eon(B), 1suz(A), 1suz(B), 1b94(A), 1b94(B), 1b97(A), 1b97(B), 1eo4(A), 1eo4(B), 2b0e(A), 2b0e(B), 1az0(A), 1az0(B), 1bgb(A), 1bgb(B), 1bsu(A), 1bsu(B), 1eo3(A), 1eo3(B), 1rva(A), 1rva(B), 2b0d(A), 2b0d(B), 1b95(A), 1b95(B), 1rv5(A), 1rv5(B), 1rvb(A), 1rvb(B), 1rvc(A), 1rvc(B), 1stx(A), 1stx(B), 1bss(A), 1bss(B), 1bua(A), 1bua(B), 1sx8(A), 1sx8(B), 1eoo(A), 1eoo(B), 1b9…
	4	1b24(A)	2vs7(A), 2vs7(D), 2vs7(G), 2vs8(A), 2vs8(F), 2vs8(K)
	5	1bam(A)	3bam(A), 3bam(B), 1esg(A), 1esg(B), 2bam(A), 2bam(B), 1bhm(A), 1bhm(B)
	6	1baz(A), 1baz(B), 1baz(C), 1baz(D), 1myk(A), 1myk(B), 1myl(A), 1myl(B), 1myl(C), 1myl(D), 1myl(E), 1myl(F)	1bdt(A), 1bdt(B), 1bdt(C), 1bdt(D), 1par(A), 1par(B), 1par(C), 1par(D), 1bdv(A), 1bdv(B), 1bdv(C), 1bdv(D)
	7	1bjt(A), 1bgw(A)	3l4j(A), 3l4k(A)
	8	1bm9(A), 1bm9(B), 1j0r(A), 1j0r(B)	1f4k(A), 1f4k(B), 2efw(A), 2efw(B), 2efw(F), 2efw(G)
	9	1bpe(A)	2fmp(A), 3ogu(A), 3jpq(A), 1tv9(A), 2fms(A), 3isb(A), 3isc(A), 3jpo(A), 3jps(A), 3mby(A), 1zjm(A), 2i9g(A), 2iso(A), 2pxi(A), 3jpp(A), 3jpr(A), 3c2m(A), 3jpn(A), 3jpt(A), 1bpy(A), 2fmq(A), 2isp(A), 3gdx(A), 1bpx(A), 3c2k(A), 2p66(A), 1bpz(A), 1huo(A), 1huo(B), 1huz(A), 1huz(B), 1tva(A), 3c2l(A), 3isd(A), 9icw(A), 9icx(A), 1zjn(A), 1zqi(A), 8ick(A), 8ico(A), 9ick(A), 9icv(A), 1mq3(A), 1zqp(A), 7ic…
	10	1ci4(A), 1ci4(B)	2bzf(A)
	11	1ci6(B)	1h89(A), 1h89(B)
	12	1cmb(A), 1cmb(B), 1cmc(A), 1cmc(B), 1mjl(A), 1mjl(B), 1mjk(A), 1mjk(B)	1mjo(A), 1mjo(B), 1mjo(C), 1mjo(D), 1mjm(A), 1mjm(B), 1mj2(A), 1mj2(B), 1mj2(C), 1mj2(D), 1mjq(A), 1mjq(B), 1mjq(C), 1mjq(D), 1mjq(G), 1mjq(H), 1mjq(I), 1mjq(J), 1cma(A), 1cma(B)
	13	1eaq(A), 1eaq(B), 1eao(A), 1eao(B), 1ean(A), 1ljm(A), 1ljm(B), 1e50(A), 1e50(C), 1e50(E), 1e50(G), 1e50(Q), 1e50(R), 2j6w(A), 2j6w(B)	1h9d(A), 1h9d(C), 1hjc(A), 1hjc(D)
	14	1es8(A)	1dfm(A), 1dfm(B), 1d2i(A), 1d2i(B)
	15	1eto(A), 1eto(B), 1etx(A), 1etx(B), 1fip(A), 1fip(B), 1etv(A), 1etv(B), 1etw(A), 1etw(B), 1ety(A), 1ety(B), 1fia(A), 1fia(B), 1etk(A), 1etk(B), 3fis(A), 3fis(B), 4fis(A), 4fis(B), 1f36(A), 1f36(B), 1etq(A), 1etq(B), 1etq(C), 1etq(D)	3jrh(A), 3jrh(B), 3iv5(A), 3iv5(B), 3jr9(A), 3jr9(B)
	16	1ev7(A), 1ev7(B)	1iaw(A), 1iaw(B)
	17	1evx(A), 1evx(B)	1a73(A), 1a73(B), 1cyq(A), 1cyq(B), 1cz0(A), 1cz0(B), 1a74(A), 1a74(B), 1ipp(A), 1ipp(B), 2o6m(A), 2o6m(B)
	18	1f9f(A), 1f9f(B), 1f9f(C), 1f9f(D)	1jj4(A), 1jj4(B)
	19	1fc3(A), 1fc3(B), 1fc3(C)	1lq1(A), 1lq1(B), 1lq1(C), 1lq1(D)
	20	1fr2(B), 2gyk(B), 2gyk(F), 2gzj(B), 2gzj(F), 2vln(B), 2vlq(B), 1emv(B), 2gzg(B), 2gzi(B), 2gzf(B), 2wpt(B), 1fsj(B), 1fsj(C), 1fsj(D), 1fsj(E), 2gze(B), 2vlo(B), 1v13(A), 1v13(B), 2vlp(B), 1bxi(B)	1v15(A), 1v15(B), 1v15(C), 1v15(D), 1v14(A), 1v14(B), 1v14(C), 1v14(D)
	21	1fvi(A), 1p8l(A)	2q2t(A)
	22	1fx7(A), 1fx7(B), 1fx7(C), 1fx7(D)	1u8r(A), 1u8r(B), 1u8r(C), 1u8r(D), 1u8r(G), 1u8r(H), 1u8r(I), 1u8r(J)
	23	1gxq(A)	1gxp(A), 1gxp(B), 1gxp(E), 1gxp(F)
	24	1hmy(A), 2hmy(B), 1svu(A), 1svu(B)	2c7p(A), 2c7q(A), 2c7o(A), 2c7r(A), 3eeo(A), 2hr1(A), 2uyc(A), 6mht(A), 2uz4(A), 1skm(A), 1fjx(A), 9mht(A), 1m0e(A), 10mh(A), 1mht(A), 2uyh(A), 2i9k(A), 3mht(A), 4mht(A), 5mht(A), 2z6u(A), 2zcj(A), 8mht(A), 2z6q(A), 7mht(A), 2z6a(A)
	25	1hw5(A), 1hw5(B), 1i5z(A), 1i5z(B), 1g6n(A), 1g6n(B), 1i6x(A), 1i6x(B), 2gzw(A), 2gzw(B), 2gzw(C), 2gzw(D), 3fwe(A), 3fwe(B)	1zrf(A), 1zrf(B), 2cgp(A), 1j59(A), 1j59(B), 1run(A), 1run(B), 1ruo(A), 1ruo(B), 1o3t(A), 1o3t(B), 1zrc(A), 1zrc(B), 1zrd(A), 1zrd(B), 1zre(A), 1zre(B)
	26	1ih7(A), 3cfo(A), 1waj(A)	3nae(A), 3lzj(A), 3l8b(A), 3l8b(B), 3lzi(A), 2dtu(A), 2dtu(B), 2dtu(C), 2dtu(D), 3cfr(A), 3cfp(A), 3cq8(A), 1ig9(A), 2dy4(A), 2dy4(B), 2dy4(C), 2dy4(D), 1q9x(A), 1q9x(B), 1q9x(C), 1q9x(D), 1clq(A), 2ozs(A), 1q9y(A), 2p5g(A), 2p5g(B), 2p5g(C), 2p5g(D), 2p5o(A), 2p5o(B), 2p5o(C), 2p5o(D), 2oyq(A), 2oyq(B), 2oyq(C), 2oyq(D), 2ozm(A)
	27	1ii7(A), 1ii7(B), 1s8e(A), 1s8e(B)	3dsd(A), 3dsd(B), 3dsc(A)
	28	1ikn(A), 1nfi(A), 1nfi(C)	2ram(A), 2ram(B), 1lei(A), 1ram(A), 1ram(B), 1le5(A), 1le5(E), 2i9t(A), 1vkx(A)
	29	1jbg(A)	1r8d(A), 1r8d(B)
	30	1jeq(A)	1jey(A)
	31	1jeq(B)	1jey(B)
	32	1jg7(A), 1jix(A), 1nvk(A), 1j39(A), 1c3j(A), 1jg6(A), 1nzd(A), 1jiv(A), 1nzf(A), 2bgt(A), 2bgu(A), 1qkj(A), 1jej(A), 1jiu(A)	1m5r(A), 1m5r(B), 1sxq(A), 1sxq(B), 1ixy(A), 1ixy(B), 1sxp(A), 1sxp(B)
	33	1jhg(A), 2oz9(R), 1p6z(N), 1p6z(R), 3wrp(A), 1zt9(A), 1zt9(B), 1zt9(D), 1zt9(E), 1wrp(R)	1tro(A), 1tro(C), 1tro(E), 1tro(G), 1trr(A), 1trr(B), 1trr(D), 1trr(E), 1trr(G), 1trr(H), 1trr(J), 1trr(K)
	34	1jih(A), 1jih(B)	3mfi(A), 3mfh(A), 2wtf(A), 2wtf(B), 2xgp(A), 2xgp(B), 2xgq(A), 2xgq(B)
	35	1jjh(A), 1jjh(B), 1jjh(C)	2bop(A)
	36	1jye(A), 3edc(A), 3edc(B), 3edc(C), 3edc(D), 1lbi(A), 1lbi(B), 1lbi(C), 1lbi(D)	1efa(A), 1efa(B), 1efa(C)
	37	1k0z(A), 1k0z(B), 1pvu(A), 1pvu(B), 1ni0(A), 1ni0(B), 1ni0(C)	3pvi(A), 3pvi(B), 2pvi(A), 2pvi(B), 1eyu(A), 1eyu(B), 1f0o(A), 1f0o(B), 1pvi(A), 1pvi(B)
	38	1ko9(A)	1m3q(A), 1lwy(A), 2noh(A), 1m3h(A), 1ebm(A), 1lww(A), 2nob(A), 1n39(A), 1n3a(A), 2noe(A), 1lwv(A), 3ktu(A), 1hu0(A), 2nof(A), 2noi(A), 1yqr(A), 2noz(A), 1yqk(A), 1yqm(A), 2nol(A), 1fn7(A), 1yql(A), 2i5w(A), 1n3c(A)
	39	1ku3(A)	1rio(H), 1ku7(A), 1ku7(D)
	40	1mij(A)	1xpx(A)
	41	1mml(A), 1nnd(A)	3fsi(A), 1ztw(A), 2fjx(A), 1ztt(A), 2fjw(A), 1i6j(A), 1n4l(A), 2r2t(A), 2fjv(A), 2r2r(A), 2fvr(A), 2fvp(A), 1d1u(A), 1qai(A), 1qai(B), 1qaj(A), 1qaj(B), 2fvq(A), 2r2u(A), 2fvs(A), 2r2s(A)
	42	1mpg(A), 1mpg(B), 1pvs(A), 1pvs(B)	3cw7(A), 3cw7(B), 3cw7(C), 3cw7(D), 3cws(A), 3cws(B), 3cws(C), 3cws(D), 3cwt(A), 3cwt(B), 3cwt(C), 3cwt(D), 3cvs(A), 3cvs(B), 3cvs(C), 3cvs(D), 3cwa(A), 3cwa(B), 3cwa(C), 3cwa(D), 1diz(A), 1diz(B), 3cvt(A), 3cvt(B), 3cvt(C), 3cvt(D), 3cwu(A), 3cwu(B), 3cwu(C), 3cwu(D), 3ogd(A), 3oh9(A), 3oh6(A), 3d4v(A), 3d4v(B), 3d4v(C), 3d4v(D)
	43	1mug(A)	1mwi(A), 1mtl(A), 1mtl(B), 1mwj(A)
	44	1okr(A), 1okr(B), 1sd6(A), 1sd6(B), 1sd7(A), 1sd7(B)	1sax(A), 1sax(B)
	45	1ouo(A)	1oup(A), 1oup(B), 2ivk(A), 2ivk(B), 2ivk(C), 2ivk(D)
	46	1owl(A), 1qnf(A), 1owm(A), 1own(A), 1owo(A), 1owp(A)	1tez(A), 1tez(B), 1tez(C), 1tez(D)
	47	1p7i(A), 1p7i(B), 1p7i(C), 1p7i(D), 1p7j(A), 1p7j(B), 1p7j(C), 1p7j(D)	2hdd(A), 2hdd(B), 2hos(A), 2hos(B), 1du0(A), 1du0(B), 2hot(A), 2hot(B), 3hdd(A), 3hdd(B), 1hdd(C), 1hdd(D)
	48	1q0s(A)	1yf3(A), 1yf3(B), 1yfj(A), 1yfj(B), 1yfj(C), 1yfj(D), 1yfj(E), 1yfj(F)
	49	1q3b(A), 1q3c(A), 1q39(A)	1k3x(A), 2ea0(A), 1k3w(A), 2opf(A), 2oq4(A), 2oq4(B)
	50	1q8i(A), 3k5o(A), 3k5o(B)	3k59(A), 3k5m(A), 3k58(A), 3k57(A), 3maq(A), 3k5l(A)
	51	1qht(A), 1tgo(A), 1qqc(A), 2vwk(A), 1wn7(A)	2vwj(A)
	52	1qtw(A), 2nqh(A)	2nq9(A), 1qum(A), 2nqj(A), 2nqj(B)
	53	1r69(A)	1per(L), 1per(R), 1rpe(L), 1rpe(R), 2or1(L), 2or1(R)
	54	1sdo(A)	2p0j(A), 2p0j(B), 1vrr(A), 1vrr(B)
	55	1tzy(A), 1tzy(E), 2aro(A), 2aro(E), 1hq3(A), 1hq3(E)	1kx5(C), 1kx5(G), 1kx3(C), 1kx3(G), 1s32(C), 1s32(G), 3c1b(C), 3c1b(G), 1m19(C), 1m19(G), 1p3i(C), 1p3i(G), 2nqb(C), 2nqb(G), 3mgr(C), 3mgr(G), 1p3l(C), 1p3l(G), 2pyo(C), 2pyo(G), 3mgp(C), 3mgp(G), 1m18(C), 1m18(G), 1eqz(A), 1eqz(E), 2cv5(C), 2cv5(G), 3afa(C), 3afa(G), 3lz0(C), 3lz0(G), 3lz1(C), 3lz1(G), 1kx4(C), 1kx4(G), 1m1a(C), 1m1a(G), 2nzd(C), 2nzd(G), 3mgq(C), 3mgq(G), 1p34(C), 1p34(G), 1p3…
	56	1tzy(B), 1tzy(F), 2aro(B), 2aro(F), 1hq3(B), 1hq3(F)	1kx5(D), 1kx5(H), 1kx3(D), 1kx3(H), 1s32(D), 1s32(H), 3c1b(D), 3c1b(H), 1m19(D), 1m19(H), 1p3i(D), 1p3i(H), 3mgr(D), 3mgr(H), 1p3l(D), 1p3l(H), 3mgp(D), 3mgp(H), 1m18(D), 1m18(H), 1eqz(B), 1eqz(F), 2cv5(D), 2cv5(H), 3afa(D), 3afa(H), 3lz0(D), 3lz0(H), 3lz1(D), 3lz1(H), 1f66(D), 1f66(H), 1kx4(D), 1kx4(H), 1m1a(D), 1m1a(H), 2nzd(D), 2nzd(H), 3mgq(D), 3mgq(H), 1p34(D), 1p34(H), 1p3g(D), 1p3g(H), 1p3…
	57	1tzy(C), 1tzy(G), 2aro(C), 2aro(G), 1hq3(C), 1hq3(G), 2io5(B)	1kx5(A), 1kx5(E), 1kx3(A), 1kx3(E), 1s32(A), 1s32(E), 3c1b(A), 3c1b(E), 1m19(A), 1m19(E), 1p3i(A), 1p3i(E), 2nqb(A), 2nqb(E), 3mgr(A), 3mgr(E), 1p3l(A), 1p3l(E), 2pyo(A), 2pyo(E), 3mgp(A), 3mgp(E), 1m18(A), 1m18(E), 1eqz(C), 1eqz(G), 2cv5(A), 2cv5(E), 3afa(A), 3afa(E), 3lz0(A), 3lz0(E), 3lz1(A), 3lz1(E), 1f66(A), 1f66(E), 1kx4(A), 1kx4(E), 1m1a(A), 1m1a(E), 2nzd(A), 2nzd(E), 3mgq(A), 3mgq(E), 1p3…
	58	1tzy(D), 1tzy(H), 2aro(D), 2aro(H), 1hq3(D), 1hq3(H), 3nqu(B), 2io5(C)	1kx5(B), 1kx5(F), 1kx3(B), 1kx3(F), 1s32(B), 1s32(F), 3c1b(B), 3c1b(F), 1m19(B), 1m19(F), 1p3i(B), 1p3i(F), 2nqb(B), 2nqb(F), 3mgr(B), 3mgr(F), 1p3l(B), 1p3l(F), 2pyo(B), 2pyo(F), 3mgp(B), 3mgp(F), 1m18(B), 1m18(F), 1eqz(D), 1eqz(H), 2cv5(B), 2cv5(F), 3afa(B), 3afa(F), 3lz0(B), 3lz0(F), 3lz1(B), 3lz1(F), 1f66(B), 1f66(F), 1kx4(B), 1kx4(F), 1m1a(B), 1m1a(F), 2nzd(B), 2nzd(F), 3mgq(B), 3mgq(F), 1p3…
	59	1vhi(A), 1vhi(B)	1b3t(A), 1b3t(B)
	60	1vok(A), 1vok(B)	1qna(A), 1qna(B), 1qn4(A), 1qn4(B), 1qn9(A), 1qn9(B), 1qne(A), 1qne(B), 1qn5(A), 1qn5(B), 1qn3(A), 1qn3(B), 1qn6(A), 1qn6(B), 1qn8(A), 1qn8(B), 1qnb(A), 1qnb(B), 1qn7(A), 1qn7(B), 1qnc(A), 1qnc(B), 1vol(B)
	61	1vsr(A)	1odg(A)
	62	1w9h(A)	2w42(A), 2w42(B)
	63	1wtd(A), 1wtd(B)	1wte(A), 1wte(B)
	64	1xhx(A), 1xhx(B), 1xhx(C), 1xhx(D)	2pyj(A), 2pyj(B), 2pyl(A), 2pzs(A), 2pzs(B), 2pzs(C), 2pzs(D)
	65	1xv5(A)	1y8z(A), 1y8z(B), 1y6f(A), 1y6f(B), 1ya6(A), 1ya6(B), 1y6g(A), 1y6g(B)
	66	1xwl(A)	2hhv(A), 1nk4(A), 1u4b(A), 1njx(A), 1l3s(A), 1l3t(A), 1nk0(A), 3ht3(A), 3ht3(D), 1l3v(A), 3hpo(A), 1l3u(A), 1nkc(A), 1nke(A), 2bdp(A), 2hhq(A), 2hhs(A), 2hhu(A), 4bdp(A), 3hp6(A), 3hp6(D), 2hhw(A), 2hhw(D), 1njw(A), 1nk7(A), 1nk8(A), 1nk9(A), 1xc9(A), 3bdp(A), 3ez5(A), 3ez5(D), 1l5u(A), 1lv5(A), 1lv5(B), 2hvi(A), 2hvi(D), 2hw3(A), 1njy(A), 1njz(A), 1nkb(A), 1u47(A), 1ua1(A), 1u45(A), 2hht(A), 1nk…
	67	1ynm(A)	2fkc(A), 2fkc(B), 2fl3(A), 2flc(A)
	68	1z91(A)	1z9c(A), 1z9c(B), 1z9c(C), 1z9c(D), 1z9c(E), 1z9c(F)
	69	1zbf(A)	3ey1(A), 3i8d(A), 3i8d(C), 3d0p(A), 3d0p(C)
	70	2a40(B), 2a40(E), 2a42(B), 3dni(A), 2a3z(B), 2d1k(B), 2a41(B), 1atn(D)	2dnj(A), 1dnk(A)
	71	2a6m(A), 2a6m(B)	2vih(A), 2vih(B), 2vic(A), 2vic(B), 2vju(A), 2vju(B), 2a6o(A), 2a6o(B), 2vhg(A), 2vhg(B)
	72	2aud(A)	2gig(A), 2gig(B), 2gij(A), 2gij(B), 3e40(A), 3e40(B), 3e3y(A), 3e3y(B), 2gii(A), 2gii(B), 1tx3(A), 1tx3(B), 1tx3(C), 1tx3(D), 1xhv(A), 1xhv(B), 1xhv(C), 1xhv(D), 2gih(A), 2gih(B), 3e44(A), 3e44(B), 1kc6(A), 1kc6(B), 1kc6(C), 1kc6(D), 2gie(A), 2gie(B), 2gie(C), 2gie(D), 3e42(A), 3e42(B), 3e41(A), 3e41(B), 3e43(A), 3e43(B), 3e45(A), 3e45(B), 1tw8(A), 1tw8(B), 1tw8(C), 1tw8(D), 1xhu(A), 1xhu(B), 1xh…
	73	2bnk(A), 2bnk(B)	2c5r(A), 2c5r(B), 2c5r(C), 2c5r(D), 2c5r(E), 2c5r(F)
	74	2ckx(A)	2qhb(A), 2qhb(B)
	75	2cpg(A), 2cpg(B), 2cpg(C)	1b01(A), 1b01(B), 1ea4(A), 1ea4(B), 1ea4(D), 1ea4(E), 1ea4(F), 1ea4(G), 1ea4(H), 1ea4(J), 1ea4(K), 1ea4(L)
	76	2d3y(A)	2dp6(A), 2dem(A), 2ddg(A)
	77	2dt5(A), 2dt5(B), 3ikv(A), 3ikv(B), 1xcb(A), 1xcb(B), 1xcb(C), 1xcb(D), 1xcb(E), 1xcb(F), 1xcb(G)	3ikt(A), 3ikt(B), 3il2(A), 3il2(B)
	78	2end(A), 1enj(A), 1enk(A), 1eni(A)	2fcc(A), 2fcc(B), 1vas(A)
	79	2f4q(A)	3m4a(A)
	80	2fip(A), 2fip(B), 2fip(C), 2fip(D), 2fip(E), 2fip(F)	2fio(A), 2fio(B)
	81	2fok(A), 2fok(B)	1fok(A)
	82	2frh(A), 2frh(B), 2fnp(A), 2fnp(B)	1fzp(B), 1fzp(D)
	83	2fuf(A), 2ipr(A), 2ipr(B), 2itj(A), 2itj(B), 2if9(A), 2if9(B)	2itl(A), 2itl(B), 2nl8(A), 2ntc(A), 2ntc(B)
	84	2gpe(A), 2gpe(B), 2gpe(C), 2gpe(D)	2rbf(A), 2rbf(B)
	85	2gxg(A), 2eb7(A), 3gf2(A), 3gfl(A), 3gez(A), 2yr2(A), 2yr2(B), 3gfm(A), 3gfj(A)	3gfi(A), 3gfi(C)
	86	2hts(A)	3hts(B), 1fyl(A), 1fyl(B), 1fym(A), 1fym(B)
	87	2iru(A), 2iru(B), 2iry(A), 2iry(B), 2irx(A)	2r9l(A), 2r9l(B)
	88	2nov(A), 2nov(B), 2nov(C), 2nov(D)	3k9f(A), 3k9f(B)
	89	2oa9(A), 2oa9(B)	2oaa(A), 2oaa(B)
	90	2odh(A)	2odi(A), 2odi(B), 2q10(A), 2q10(B), 3imb(A), 3imb(B), 3imb(C), 3imb(D)
	91	2ofk(A), 2ofk(B)	2ofi(A)
	92	2ore(D), 2ore(E), 2ore(F)	2g1p(A), 2g1p(B)
	93	2p5k(A)	2p5l(C), 2p5l(D), 2p5l(G), 2p5l(H)
	94	2po4(A)	3c2p(A), 3c2p(B), 3c46(A), 3c46(B), 3c3l(A), 3c3l(B)
	95	2qsf(A)	2qsh(A)
	96	2rdi(A), 3fds(A)	1jx4(A), 2jej(A), 3m9n(B), 2asd(A), 2asd(B), 1s9f(A), 1s9f(B), 1s9f(C), 1s9f(D), 2bq3(A), 3m9o(B), 3khr(A), 3khr(B), 1rys(A), 1rys(B), 2imw(P), 2uvw(A), 1jxl(A), 1s0o(A), 1s0o(B), 1s10(A), 2agq(A), 3khl(A), 3khl(B), 2br0(A), 2jef(A), 1n48(A), 2rdj(A), 2rdj(B), 2uvv(A), 2xc9(A), 2ibk(A), 2c28(A), 1ryr(A), 2w9b(A), 2w9b(B), 2asj(A), 2asj(B), 2bqr(A), 2jeg(A), 2r8i(A), 2jei(A), 1n56(A), 1n56(B), 1s9…
	97	2v1x(A), 2v1x(B)	2wwy(A), 2wwy(B)
	98	2ve8(A), 2ve8(B), 2ve8(C), 2ve8(D), 2ve8(E), 2ve8(F), 2ve8(G), 2ve8(H)	2ve9(A), 2ve9(B), 2ve9(C), 2ve9(D), 2ve9(E), 2ve9(F)
	99	2vke(A), 2vkv(A), 2o7o(A), 3fk7(A), 3fk7(B), 2tct(A), 3fk6(A), 3fk6(B), 2xge(A), 2xge(B), 2xgc(A), 2xgc(B), 1bjz(A), 2fj1(A), 2xgd(A), 2x9d(A), 1a6i(A), 1bj0(A), 1ork(A), 2trt(A), 2xb5(A), 1bjy(A), 1bjy(B)	1qpi(A)
	100	2wcw(A), 2wcw(B), 2wcw(C), 2wcw(D), 2wcz(A), 2wcz(B)	2wiw(A), 2wiw(B)
	101	2wiu(B), 2wiu(D)	3dnv(B), 3hzi(B)
	102	2x6u(A)	2x6v(A), 2x6v(B)
	103	2yve(A), 2yve(B), 2zoy(A), 2zoy(B), 2zoz(A), 2zoz(B)	2yvh(A), 2yvh(B), 2yvh(C), 2yvh(D)
	104	2zd1(A), 3dlk(A), 3bgr(A), 1rth(A), 1vrt(A), 3dlg(A), 3lp1(A), 2ops(A), 2rki(A), 3dya(A), 3lak(A), 3lak(B), 3mec(A), 1rtj(A), 1s1t(A), 1vru(A), 2rf2(A), 3mee(A), 2be2(A), 1c1b(A), 1c1c(A), 1ep4(A), 1fk9(A), 1jkh(A), 1jla(A), 2hnd(A), 2hny(A), 2iaj(A), 3dle(A), 3dol(A), 3isn(C), 3med(A), 3lal(A), 3lal(B), 1c0u(A), 1rt1(A), 1rt2(A), 2opp(A), 3is9(A), 3lan(A), 3lan(B), 1jlf(A), 1jlg(A), 1rev(A), 1s1…	3kk1(A), 1r0a(A), 2hmi(A), 3kk2(A), 3kk3(A), 3klh(A)
	105	2zkg(A), 2zkg(B), 2zkg(C), 2zkg(D)	3fde(A), 3fde(B), 2zkd(A), 2zkd(B), 2zo1(B), 3f8j(B), 2zo0(B), 3f8i(A), 3f8i(B), 2zkf(A), 2zke(A)
	106	2znz(A), 2znz(B), 2znz(C), 2znz(D), 2znz(E), 2znz(F), 2znz(G), 2znz(H), 2zny(A), 2zny(B), 2zny(C), 2zny(D), 2zny(E), 2zny(F), 2zny(G), 2zny(H), 1ri7(A)	2e1c(A)
	107	3a45(A), 3a45(B), 3a42(A)	3a46(A), 3a46(B)
	108	3bqz(A), 3bqz(B), 3br0(A), 3br0(B), 1jt6(A), 1jt6(B), 1jt6(D), 1jt6(E), 1rkw(A), 1rkw(B), 1rkw(D), 1rkw(E), 3bt9(A), 3bt9(B), 3bt9(D), 3bt9(E), 2dtz(A), 2dtz(B), 2dtz(D), 2dtz(E), 2hq5(A), 2hq5(B), 2hq5(D), 2hq5(E), 3br3(A), 3br3(B), 1jus(A), 1jus(B), 1jus(D), 1jus(E), 1jtx(A), 1jtx(B), 1jtx(D), 1jtx(E), 3bti(A), 3bti(B), 3bti(D), 3bti(E), 2g0e(A), 2g0e(B), 2g0e(D), 2g0e(E), 1qvt(A), 1qvt(B), 1qv…	1jt0(A), 1jt0(B), 1jt0(C), 1jt0(D)
	109	3bvq(A), 3bvq(B)	3c25(A), 3c25(B)
	110	3bvs(A)	3jxy(A), 3jx7(A), 3jxz(A), 3jy1(A)
	111	3d06(A), 3d08(A), 2vuk(A), 2vuk(B), 2pcx(A), 2j21(A), 2j21(B), 2x0u(A), 2x0u(B), 2j1x(A), 2j1x(B), 2j1y(A), 2j1y(B), 2j1y(C), 2j1y(D), 3d05(A), 2wgx(A), 2wgx(B), 2bip(A), 2biq(A), 2j1w(A), 2j1w(B), 2j1z(A), 2j1z(B), 2j20(A), 2j20(B), 2x0v(A), 2x0v(B), 1uol(A), 1uol(B), 2bin(A), 2bio(A), 3d09(A), 2bim(A), 2bim(B), 2ocj(A), 2ocj(B), 2ocj(C), 2ocj(D), 2x0w(A), 2x0w(B), 1ycs(A), 3d07(A), 3d07(B), 1gz…	3igk(A), 2ac0(A), 2ac0(B), 2ac0(C), 2ac0(D), 3d0a(A), 3d0a(B), 3d0a(C), 3d0a(D), 3igl(A), 2ahi(A), 2ahi(B), 2ahi(C), 2ahi(D), 3kz8(A), 3kz8(B), 3kmd(A), 3kmd(B), 3kmd(C), 3kmd(D), 1tsr(A), 1tsr(B), 1tsr(C), 1tup(A), 1tup(B), 1tup(C), 2ata(A), 2ata(B), 2ata(C), 2ata(D), 2ady(A), 2ady(B)
	112	3d1g(A), 3d1g(B), 1ok7(A), 1ok7(B), 3f1v(A), 3f1v(B), 1mmi(A), 1mmi(B), 1unn(A), 1unn(B), 3d1e(A), 3d1e(B), 3d1f(A), 3d1f(B), 1jql(A), 2pol(A), 2pol(B), 1jqj(A), 1jqj(B)	3bep(A), 3bep(B)
	113	3e5u(A), 3e5u(B), 3e5u(C), 3e5u(D), 3e5x(A), 3e5x(B), 3e5x(C), 3e5x(D), 3e6d(A), 3e6d(B), 3e6b(A), 3e6b(B), 2h6b(A), 2h6b(B)	3e6c(C)
	114	3ei3(B)	3ei2(B), 3ei1(B)
	115	3f0z(A), 3f10(A)	3i0w(A), 3i0x(A)
	116	3fci(A), 2hxm(A), 1akz(A), 3fck(B), 3fcl(A), 3fcl(B), 3fcf(A), 1ugh(E), 1yuo(A)	1emh(A), 1q3f(A), 1ssp(E), 1emj(A), 2oyt(A), 2ssp(E), 2oxm(A), 4skn(E)
	117	3fhf(A)	3knt(A), 3knt(B), 3knt(C), 3knt(D)
	118	3g91(A), 3fzi(A), 3g8v(A), 3g0a(A)	3g00(A), 3g00(B), 3ga6(A), 3ga6(B), 3g2d(A), 3g2d(B), 3g0r(A), 3g0r(B), 3g4t(A), 3g4t(B)
	119	3gn5(A), 3gn5(B)	3o9x(A), 3o9x(B)
	120	3gva(A), 3gva(B)	3gx4(X), 3gyh(X)
	121	3gz5(A), 3gz5(B)	3gz6(A), 3gz6(B)
	122	3hd0(A), 3hd0(B), 3hd0(D)	2w36(A), 2w36(B), 2w35(A), 2w35(B)
	123	3i3q(A), 3i3q(B), 2fdj(A), 3khb(A), 3khb(B)	3o1t(A), 3o1p(A), 3o1u(A), 3o1s(A), 3bkz(A), 3bie(A), 3o1m(A), 3o1r(A), 3bi3(A), 3o1v(A), 3o1o(A), 3khc(A), 3khc(B)
	124	3iao(A)	1r8e(A), 3d6z(A), 3d6y(A), 3d70(A), 3d71(A)
	125	3lsj(A), 3lsj(B)	3lsr(A), 3lsp(A)
	126	3mx1(A)	3mx4(A), 3mx4(B), 3mx4(C), 3mx4(D), 3mx4(E), 3mx4(F), 3mx4(G), 3mx4(H), 3nic(A), 3nic(B), 3nic(C), 3nic(D), 3nic(E), 3nic(F), 3nic(G), 3nic(H)

## Sheet: DBfree(>=2)
	PDB IDs and chains in DBfree(>=2)
	Cluster ID	PDB ID(chainID)
	1	1aqi(A), 1aqi(B), 1aqj(A), 1aqj(B), 2adm(A), 2adm(B)
	3	1az3(A), 1az3(B), 1az4(A), 1az4(B), 1rve(A), 1rve(B)
	6	1baz(A), 1baz(B), 1baz(C), 1baz(D), 1myk(A), 1myk(B), 1myl(A), 1myl(B), 1myl(C), 1myl(D), 1myl(E), 1myl(F)
	7	1bjt(A), 1bgw(A)
	8	1bm9(A), 1bm9(B), 1j0r(A), 1j0r(B)
	10	1ci4(A), 1ci4(B)
	12	1cmb(A), 1cmb(B), 1cmc(A), 1cmc(B), 1mjl(A), 1mjl(B), 1mjk(A), 1mjk(B)
	13	1eaq(A), 1eaq(B), 1eao(A), 1eao(B), 1ean(A), 1ljm(A), 1ljm(B), 1e50(A), 1e50(C), 1e50(E), 1e50(G), 1e50(Q), 1e50(R), 2j6w(A), 2j6w(B)
	15	1eto(A), 1eto(B), 1etx(A), 1etx(B), 1fip(A), 1fip(B), 1etv(A), 1etv(B), 1etw(A), 1etw(B), 1ety(A), 1ety(B), 1fia(A), 1fia(B), 1etk(A), 1etk(B), 3fis(A), 3fis(B), 4fis(A), 4fis(B), 1f36(A), 1f36(B), 1etq(A), 1etq(B), 1etq(C), 1etq(D)
	16	1ev7(A), 1ev7(B)
	17	1evx(A), 1evx(B)
	18	1f9f(A), 1f9f(B), 1f9f(C), 1f9f(D)
	19	1fc3(A), 1fc3(B), 1fc3(C)
	20	1fr2(B), 2gyk(B), 2gyk(F), 2gzj(B), 2gzj(F), 2vln(B), 2vlq(B), 1emv(B), 2gzg(B), 2gzi(B), 2gzf(B), 2wpt(B), 1fsj(B), 1fsj(C), 1fsj(D), 1fsj(E), 2gze(B), 2vlo(B), 1v13(A), 1v13(B), 2vlp(B), 1bxi(B)
	21	1fvi(A), 1p8l(A)
	22	1fx7(A), 1fx7(B), 1fx7(C), 1fx7(D)
	24	1hmy(A), 2hmy(B), 1svu(A), 1svu(B)
	25	1hw5(A), 1hw5(B), 1i5z(A), 1i5z(B), 1g6n(A), 1g6n(B), 1i6x(A), 1i6x(B), 2gzw(A), 2gzw(B), 2gzw(C), 2gzw(D), 3fwe(A), 3fwe(B)
	26	1ih7(A), 3cfo(A), 1waj(A)
	27	1ii7(A), 1ii7(B), 1s8e(A), 1s8e(B)
	28	1ikn(A), 1nfi(A), 1nfi(C)
	32	1jg7(A), 1jix(A), 1nvk(A), 1j39(A), 1c3j(A), 1jg6(A), 1nzd(A), 1jiv(A), 1nzf(A), 2bgt(A), 2bgu(A), 1qkj(A), 1jej(A), 1jiu(A)
	33	1jhg(A), 2oz9(R), 1p6z(N), 1p6z(R), 3wrp(A), 1zt9(A), 1zt9(B), 1zt9(D), 1zt9(E), 1wrp(R)
	34	1jih(A), 1jih(B)
	35	1jjh(A), 1jjh(B), 1jjh(C)
	36	1jye(A), 3edc(A), 3edc(B), 3edc(C), 3edc(D), 1lbi(A), 1lbi(B), 1lbi(C), 1lbi(D)
	37	1k0z(A), 1k0z(B), 1pvu(A), 1pvu(B), 1ni0(A), 1ni0(B), 1ni0(C)
	41	1mml(A), 1nnd(A)
	42	1mpg(A), 1mpg(B), 1pvs(A), 1pvs(B)
	44	1okr(A), 1okr(B), 1sd6(A), 1sd6(B), 1sd7(A), 1sd7(B)
	46	1owl(A), 1qnf(A), 1owm(A), 1own(A), 1owo(A), 1owp(A)
	47	1p7i(A), 1p7i(B), 1p7i(C), 1p7i(D), 1p7j(A), 1p7j(B), 1p7j(C), 1p7j(D)
	49	1q3b(A), 1q3c(A), 1q39(A)
	50	1q8i(A), 3k5o(A), 3k5o(B)
	51	1qht(A), 1tgo(A), 1qqc(A), 2vwk(A), 1wn7(A)
	52	1qtw(A), 2nqh(A)
	55	1tzy(A), 1tzy(E), 2aro(A), 2aro(E), 1hq3(A), 1hq3(E)
	56	1tzy(B), 1tzy(F), 2aro(B), 2aro(F), 1hq3(B), 1hq3(F)
	57	1tzy(C), 1tzy(G), 2aro(C), 2aro(G), 1hq3(C), 1hq3(G), 2io5(B)
	58	1tzy(D), 1tzy(H), 2aro(D), 2aro(H), 1hq3(D), 1hq3(H), 3nqu(B), 2io5(C)
	59	1vhi(A), 1vhi(B)
	60	1vok(A), 1vok(B)
	63	1wtd(A), 1wtd(B)
	64	1xhx(A), 1xhx(B), 1xhx(C), 1xhx(D)
	70	2a40(B), 2a40(E), 2a42(B), 3dni(A), 2a3z(B), 2d1k(B), 2a41(B), 1atn(D)
	71	2a6m(A), 2a6m(B)
	73	2bnk(A), 2bnk(B)
	75	2cpg(A), 2cpg(B), 2cpg(C)
	77	2dt5(A), 2dt5(B), 3ikv(A), 3ikv(B), 1xcb(A), 1xcb(B), 1xcb(C), 1xcb(D), 1xcb(E), 1xcb(F), 1xcb(G)
	78	2end(A), 1enj(A), 1enk(A), 1eni(A)
	80	2fip(A), 2fip(B), 2fip(C), 2fip(D), 2fip(E), 2fip(F)
	81	2fok(A), 2fok(B)
	82	2frh(A), 2frh(B), 2fnp(A), 2fnp(B)
	83	2fuf(A), 2ipr(A), 2ipr(B), 2itj(A), 2itj(B), 2if9(A), 2if9(B)
	84	2gpe(A), 2gpe(B), 2gpe(C), 2gpe(D)
	85	2gxg(A), 2eb7(A), 3gf2(A), 3gfl(A), 3gez(A), 2yr2(A), 2yr2(B), 3gfm(A), 3gfj(A)
	87	2iru(A), 2iru(B), 2iry(A), 2iry(B), 2irx(A)
	88	2nov(A), 2nov(B), 2nov(C), 2nov(D)
	89	2oa9(A), 2oa9(B)
	91	2ofk(A), 2ofk(B)
	92	2ore(D), 2ore(E), 2ore(F)
	96	2rdi(A), 3fds(A)
	97	2v1x(A), 2v1x(B)
	98	2ve8(A), 2ve8(B), 2ve8(C), 2ve8(D), 2ve8(E), 2ve8(F), 2ve8(G), 2ve8(H)
	99	2vke(A), 2vkv(A), 2o7o(A), 3fk7(A), 3fk7(B), 2tct(A), 3fk6(A), 3fk6(B), 2xge(A), 2xge(B), 2xgc(A), 2xgc(B), 1bjz(A), 2fj1(A), 2xgd(A), 2x9d(A), 1a6i(A), 1bj0(A), 1ork(A), 2trt(A), 2xb5(A), 1bjy(A), 1bjy(B)
	100	2wcw(A), 2wcw(B), 2wcw(C), 2wcw(D), 2wcz(A), 2wcz(B)
	101	2wiu(B), 2wiu(D)
	103	2yve(A), 2yve(B), 2zoy(A), 2zoy(B), 2zoz(A), 2zoz(B)
	104	2zd1(A), 3dlk(A), 3bgr(A), 1rth(A), 1vrt(A), 3dlg(A), 3lp1(A), 2ops(A), 2rki(A), 3dya(A), 3lak(A), 3lak(B), 3mec(A), 1rtj(A), 1s1t(A), 1vru(A), 2rf2(A), 3mee(A), 2be2(A), 1c1b(A), 1c1c(A), 1ep4(A), 1fk9(A), 1jkh(A), 1jla(A), 2hnd(A), 2hny(A), 2iaj(A), 3dle(A), 3dol(A), 3isn(C), 3med(A), 3lal(A), 3lal(B), 1c0u(A), 1rt1(A), 1rt2(A), 2opp(A), 3is9(A), 3lan(A), 3lan(B), 1jlf(A), 1jlg(A), 1rev(A), 1s1…
	105	2zkg(A), 2zkg(B), 2zkg(C), 2zkg(D)
	106	2znz(A), 2znz(B), 2znz(C), 2znz(D), 2znz(E), 2znz(F), 2znz(G), 2znz(H), 2zny(A), 2zny(B), 2zny(C), 2zny(D), 2zny(E), 2zny(F), 2zny(G), 2zny(H), 1ri7(A)
	107	3a45(A), 3a45(B), 3a42(A)
	108	3bqz(A), 3bqz(B), 3br0(A), 3br0(B), 1jt6(A), 1jt6(B), 1jt6(D), 1jt6(E), 1rkw(A), 1rkw(B), 1rkw(D), 1rkw(E), 3bt9(A), 3bt9(B), 3bt9(D), 3bt9(E), 2dtz(A), 2dtz(B), 2dtz(D), 2dtz(E), 2hq5(A), 2hq5(B), 2hq5(D), 2hq5(E), 3br3(A), 3br3(B), 1jus(A), 1jus(B), 1jus(D), 1jus(E), 1jtx(A), 1jtx(B), 1jtx(D), 1jtx(E), 3bti(A), 3bti(B), 3bti(D), 3bti(E), 2g0e(A), 2g0e(B), 2g0e(D), 2g0e(E), 1qvt(A), 1qvt(B), 1qv…
	109	3bvq(A), 3bvq(B)
	111	3d06(A), 3d08(A), 2vuk(A), 2vuk(B), 2pcx(A), 2j21(A), 2j21(B), 2x0u(A), 2x0u(B), 2j1x(A), 2j1x(B), 2j1y(A), 2j1y(B), 2j1y(C), 2j1y(D), 3d05(A), 2wgx(A), 2wgx(B), 2bip(A), 2biq(A), 2j1w(A), 2j1w(B), 2j1z(A), 2j1z(B), 2j20(A), 2j20(B), 2x0v(A), 2x0v(B), 1uol(A), 1uol(B), 2bin(A), 2bio(A), 3d09(A), 2bim(A), 2bim(B), 2ocj(A), 2ocj(B), 2ocj(C), 2ocj(D), 2x0w(A), 2x0w(B), 1ycs(A), 3d07(A), 3d07(B), 1gz…
	112	3d1g(A), 3d1g(B), 1ok7(A), 1ok7(B), 3f1v(A), 3f1v(B), 1mmi(A), 1mmi(B), 1unn(A), 1unn(B), 3d1e(A), 3d1e(B), 3d1f(A), 3d1f(B), 1jql(A), 2pol(A), 2pol(B), 1jqj(A), 1jqj(B)
	113	3e5u(A), 3e5u(B), 3e5u(C), 3e5u(D), 3e5x(A), 3e5x(B), 3e5x(C), 3e5x(D), 3e6d(A), 3e6d(B), 3e6b(A), 3e6b(B), 2h6b(A), 2h6b(B)
	115	3f0z(A), 3f10(A)
	116	3fci(A), 2hxm(A), 1akz(A), 3fck(B), 3fcl(A), 3fcl(B), 3fcf(A), 1ugh(E), 1yuo(A)
	118	3g91(A), 3fzi(A), 3g8v(A), 3g0a(A)
	119	3gn5(A), 3gn5(B)
	120	3gva(A), 3gva(B)
	121	3gz5(A), 3gz5(B)
	122	3hd0(A), 3hd0(B), 3hd0(D)
	123	3i3q(A), 3i3q(B), 2fdj(A), 3khb(A), 3khb(B)
	125	3lsj(A), 3lsj(B)
